# Supplementary material
Source: publisher figshare collection journal article supplement (https://rs.figshare.com/ndownloader/files/25508894)
Supplement: Supplementary file 1 [file 25508894]

clear; close all;
%{
    This code is intended for research purposes.

    Evangelia Nicolaidou, e.nicolaidou@bristol.ac.uk
    2020-10-16
%}

model_no = 1;
main_dir = fullfile(pwd,sprintf('model %i',model_no));
main_data_file = fullfile(main_dir,'main_data.mat');
load(main_data_file);

%% Set-up
N = length(Phi);                % number of degrees of freedom
modes_ROM = [1,2];              % modes retained in ROM
NR = length(modes_ROM);         % number of modes retained in ROM
assert(NR <= 3)

% ---------------------- reduction matrix ----------------------
R_mat = zeros(NR,N);
for ii = 1:NR
    R_mat(ii,modes_ROM(ii)) = 1;
end

% ------------------------- load cases -------------------------
Fs_max = [45,270];              % maximum scale factor for each retained mode
N_inc = 5e2;                    % number of increments in each static analysis
assert(length(Fs_max) == NR);
Fs_all = Fs_max.*npermutek([-1 0 1],NR);	% all combinations of static analyses
Fs_all(all(Fs_all == 0, 2),:) = [];     % remove case of all zeros
L = size(Fs_all,1);                     % number of static analyses
fprintf('Number of static analyses needed: %i\n\n',L)

%% Run all static analyses
xN_cell = cell(1,L);
qN_cell = cell(1,L);
FR_cell = cell(1,L);
for i = 1:L
    fprintf('\nStatic analysis %i of %i...\n',i,L)
    Fs = Fs_all(i,:);
    FR = repmat(linspace(0,1,N_inc+1),[NR 1]);      % reduced modal forcing (for all increments)
    FR = FR(:,2:end).*Fs.';
    
    F_red = FR(:,end);          % (final) forcing to be applied (reduced modal space)
    F = R_mat.'*F_red;          % (final) forcing to be applied (full modal space) **
    Fx = M*Phi*R_mat.'*F_red;	% (final) forcing to be applied (full physical space)
    Fx = T*Fx;                  % transform to "full" coordinates i.e. including fixed node (zero forces at constrained modes)
    
    mkdir temp; cd temp;
    U = abaqus_static_fil(main_data_file,Fx,N_inc);	% extract displacement field from Abaqus (FOR ALL INCREMENTS)    
    cd ..; rmdir('temp','s');
    
    % extract and store displacement data (for all increments)
    assert(size(U,1)/N_nodes == N_inc);
    
    xN_full = reshape(U(:,2:end).',[6*N_nodes,N_inc]);
    xN = T\xN_full;
    qN = real(Phi\xN);
    
    % store data for current static analysis
    xN_cell{i} = xN;
    qN_cell{i} = qN;
    FR_cell{i} = FR;
end

%% Save data for all static analyses
save(fullfile(main_dir,'static data',['SD_AMF_modes=',sprintf('%i,',modes_ROM),'_Fs=',sprintf('%i,',Fs_max),'_allPerms.mat']))
